# Supplementary material for: A Li–In alloy anode and Nb2CTXartificial solid-electrolyte interphase for practical Li metal batteries
Source: Royal Society of Chemistry journal article supplement (doi:10.1039/d1ta09366e), 2022-01-01
Supplement: d1ta09366e1.pdf [file d1ta09366e1.pdf]

## Supporting Information

# Li-In alloy anode and Nb<sub>2</sub>CT<sub>x</sub> artificial solid-electrolyte interphase for practical Li metal batteries.

Seunghun Lee<sup>†, a, b</sup>, Mun Sek Kim<sup>†c</sup>, Jung-Hoon Lee<sup>d</sup>, Ji-Hyun Ryu<sup>a, b</sup>, Vandung Do<sup>a</sup>, Byeong Gwon Lee<sup>a, b</sup>, Woong Kim<sup>\*b</sup> and Won Il Cho<sup>\*a, b</sup>

<sup>a</sup> Center for Energy Storage Research, Korea Institute of Science and Technology (KIST), Hwarangno 14 -gil 5, Seongbuk-gu, Seoul, 02792, Republic of Korea

<sup>b</sup> Department of Materials Science and Engineering, Korea University, 145 Anam-ro, Seongbuk-gu, Seoul, 02841, Republic of Korea

<sup>c</sup> Department of Chemical Engineering, Stanford University, 450 Serra Mall, Stanford, California, 94305, USA.

<sup>d</sup> Computational Science Research Center, Korea Institute of Science and Technology (KIST), Hwarangno 14 -gil 5, Seongbuk-gu Seoul, 02792, Republic of Korea

<sup>†</sup> first author

## \*Corresponding Author

W. Kim. E-mail: [woongkim@korea.ac.kr](mailto:woongkim@korea.ac.kr)

W. I. Cho. E-mail: [wonic@kist.re.kr](mailto:wonic@kist.re.kr)

**This supporting figure includes:**

Fig. S1. Li-In phase diagram<sup>1</sup>.

Fig. S2. XRD patterns of Li-In alloy anode after Li stripping or plating

Fig. S3. BSE, EDX element mapping, FIB-SEM cross-sectional image of Li-In alloy anode after Li stripping.

Fig. S4. Molecular structure of  $\text{Li}_{13}\text{In}_3$  unit cell and Li diffusion pathway on (311) surface of  $\text{Li}_{13}\text{In}_3$ .

Fig. S5. SEM image and corresponding EDX element mapping image of  $\text{Nb}_2\text{CT}_x$  MXene and  $\text{Nb}_2\text{AlC}$  MAX phase.

Fig. S6. XRD patterns of  $\text{Nb}_2\text{AlC}$  and  $\text{Nb}_2\text{CT}_x$ .

Fig. S7. Wide scan XPS spectra of  $\text{Nb}_2\text{CT}_x$  MXene and  $\text{Nb}_2\text{AlC}$  MAX phase.

Fig. S8. Optical image of manufacturing process and SEM images of  $\text{Nb}_2\text{CT}_x$  Li-In anode.

Fig. S9. XRD profile of  $\text{Nb}_2\text{CT}_x$  Li-In anode.

Fig. S10. Practical areal capacity measurement of  $\text{Nb}_2\text{CT}_x$  Li-In anode.

Fig. S11. SEM surface morphologies of Li anode and Li-In alloy anode after re-electrodeposition of Li.

Fig. S12. Galvanostatic Li stripping/plating voltage profile.

Fig. S13. Full cell cycling performance and corresponding voltage profile of  $\text{Nb}_2\text{CT}_x$  Li anode.

Fig. S14. AC impedance measurement for Li|NCM 811, Li-In|NCM 811, Li-In  $\text{Nb}_2\text{CT}_x$ |NCM 811.

Fig. S15. Li-In foil thickness and further roll-pressing results.

Table S1. The calculation for termination group formation energy and Li binding energy on the  $\text{Nb}_2\text{CT}_x$  surface.

Table S2. Li-In foil thickness before and after roll-pressing.

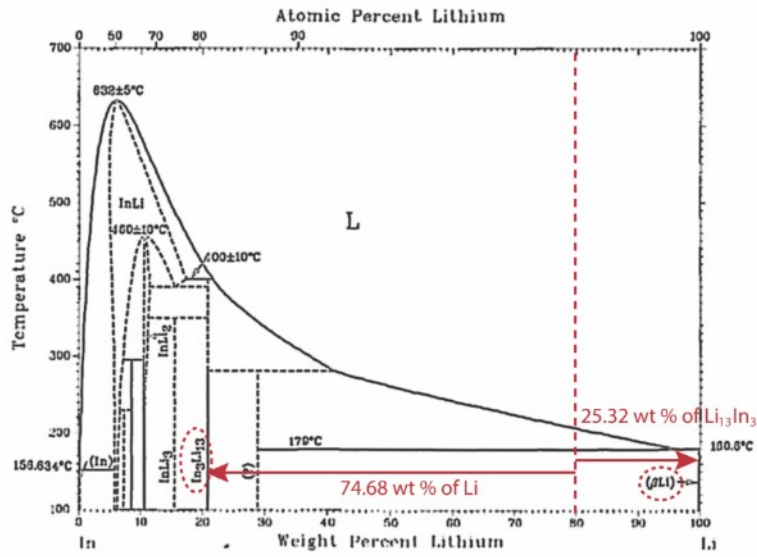

Fig. S1. Li-In phase diagram. The red dashed vertical line represents 80 wt% of Li (98.51 at % of Li) and 20 wt % of In (1.49 at % of In) composition. At the designed composition, Li-In alloy consists of 74.68 wt % of Li and 25.32 wt % of Li<sub>13</sub>In<sub>3</sub>.

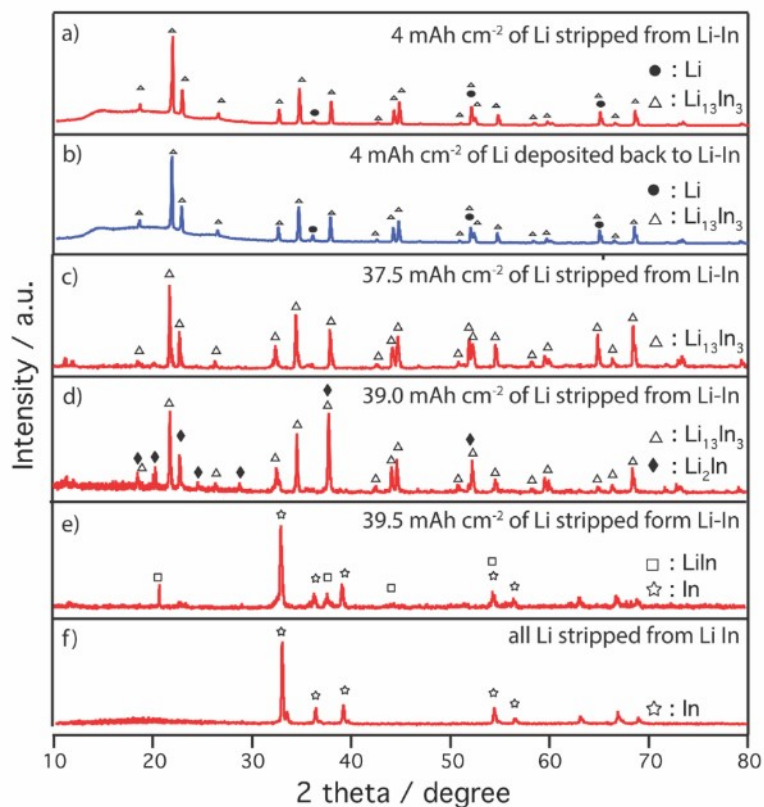

Fig. S2. XRD patterns for Li-In alloy anode after a) 4 mAh cm<sup>-2</sup> of Li stripped, b) 4 mAh cm<sup>-2</sup> Li deposited back to a), c) 37.5 mAh cm<sup>-2</sup>, d) 39.0 mAh cm<sup>-2</sup>, e) 39.5 mAh cm<sup>-2</sup>, f) all of Li stripped from Li-In alloy anode. Phase transition from Li<sub>13</sub>In<sub>3</sub> to In was observed after 37.5 mAh cm<sup>-2</sup> of Li stripped (Li<sub>13</sub>In<sub>3</sub> → Li<sub>2</sub>In → LiIn → In). XRD peak of Li, Li<sub>13</sub>In<sub>3</sub>, Li<sub>2</sub>In, LiIn, and In notice with the filled circle, empty-triangle, filled-diamond, empty-square, and empty-star shape, respectively.

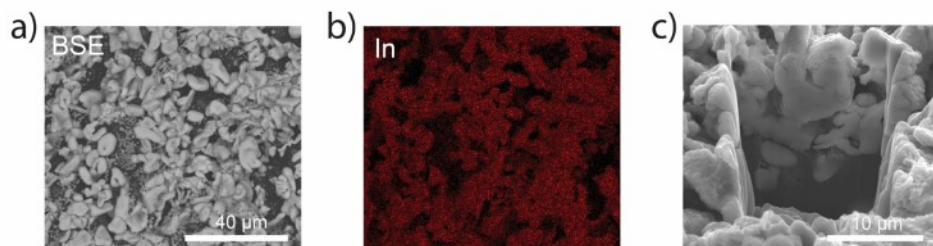

Fig. S3. a) SEM BSE mode micrographs of the Li-In alloy anode after 4 mAh  $\text{cm}^{-2}$  galvanostatic stripping of Li using Li-In|Li-In symmetric cell. Bright particles are Li-In alloy ( $\text{Li}_{13}\text{In}_3$ ), and the dark background is pristine Li. b) Corresponding EDX element mapping image for In (red). c) FIB cross-section image of Li-In after Li stripping with the same conditions as a). In the electrode's upper region, most of the Li was stripped, and only the light-colored  $\text{Li}_{13}\text{In}_3$  remains, showing an irregular porous structure, and the remained Li shows dark in the lower part of the image.

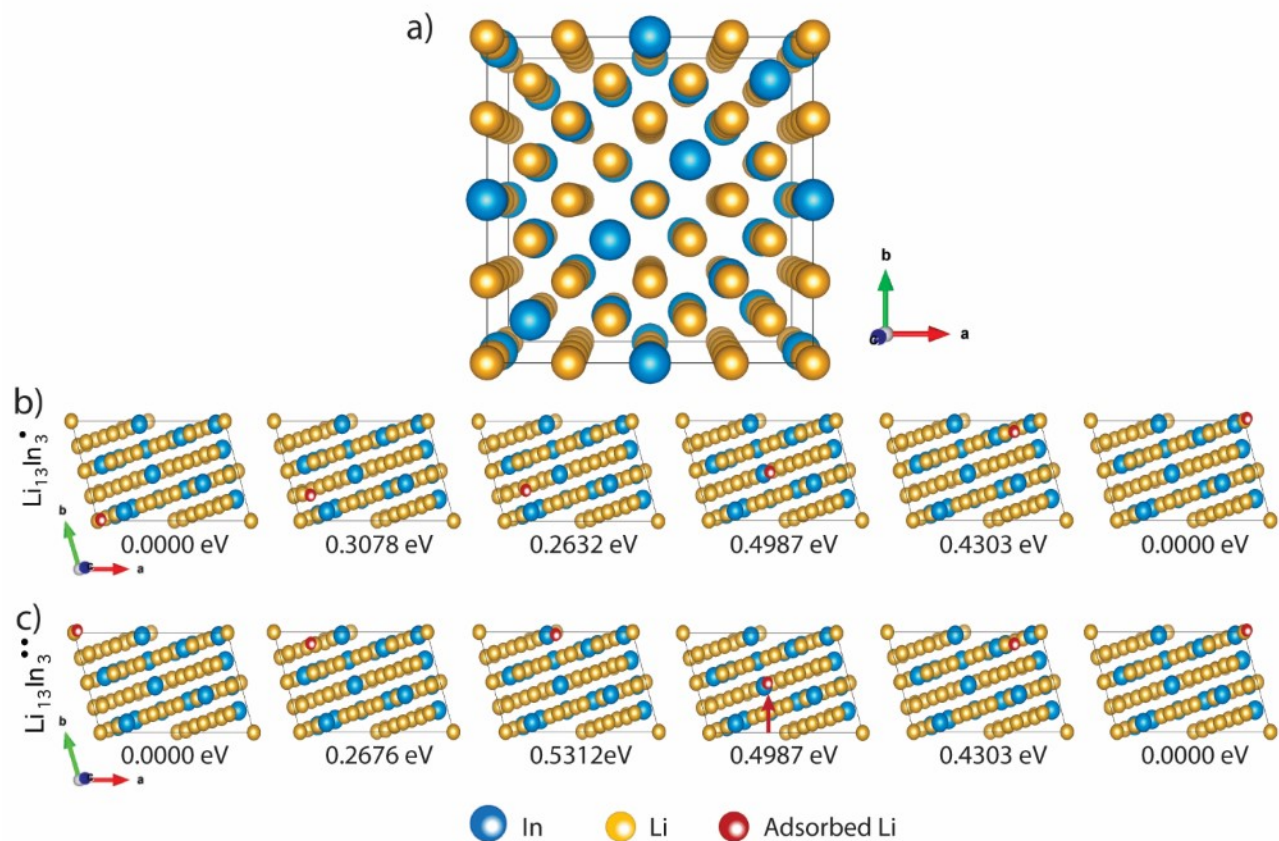

Fig. S4. a) The optimized crystal structure of  $\text{Li}_{13}\text{In}_3$ . The space group is the cubic  $\text{Fd}\bar{3}\text{m}$  with the lattice parameters  $a = b = c = 13.55 \text{ \AA}$  and  $\alpha = \beta = \gamma = 90^\circ$ . Visualization of the Li migration on the (311) surface of the  $\text{Li}_{13}\text{In}_3$  along b) pathway 1 ( $\text{Li}_{13}\text{In}_3^*$ ), c) pathway 2 ( $\text{Li}_{13}\text{In}_3^{**}$ ). The first configuration is the initial state of the diffusion process that Li adsorbed on the most stable adsorption site on the (311) of  $\text{Li}_{13}\text{In}_3$  and considered as 0 eV. The adsorbed Li migrates following its stable energetic position, and each image shows the Li when it was located at a local minimum. Values below each image are relative energy calculated with respect to the energy at the initial state. Blue and yellow spheres are In and Li of  $\text{Li}_{13}\text{In}_3$ , and the red sphere is the migrating Li adatom.

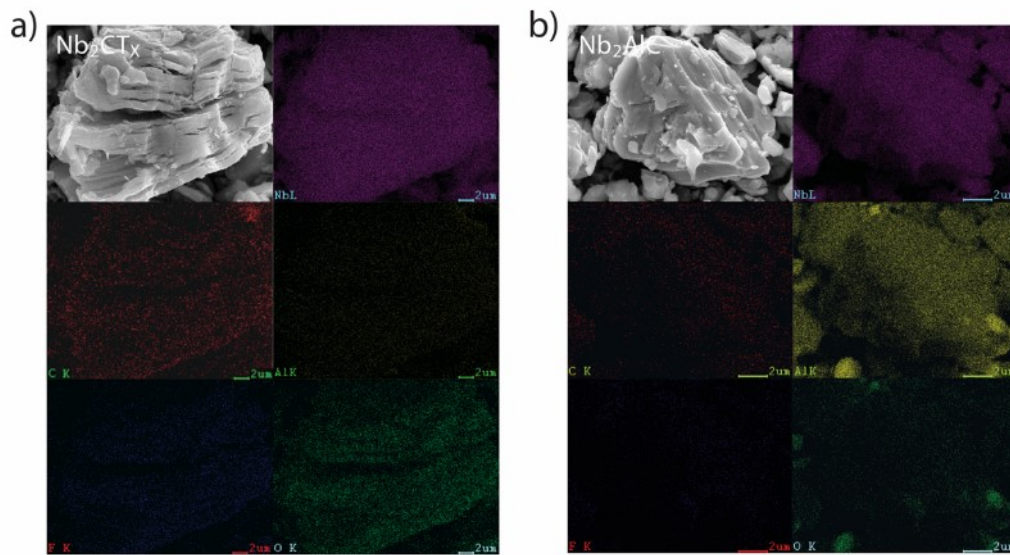

Fig. S5. SEM image and EDX element mapping images of a)  $\text{Nb}_2\text{CT}_x$  (MXene) and b)  $\text{Nb}_2\text{AlC}$  (MAX phase). EDX element mapping images in both contents correspond with Nb L (purple), C K (red), Al K (yellow), F K (blue), O K (oxygen) peak.

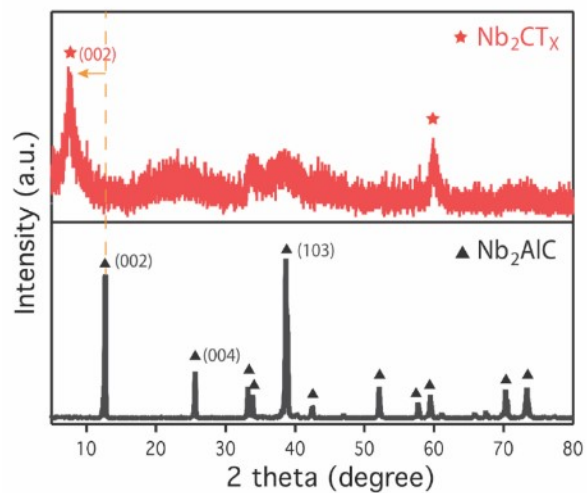

Fig. S6. XRD profiles of  $\text{Nb}_2\text{AlC}$  (bottom, black) and  $\text{Nb}_2\text{CT}_x$  (top, red). Marks on the graph correspond to the major XRD peaks  $\text{Nb}_2\text{AlC}$  (black triangle),  $\text{Nb}_2\text{CT}_x$  (red star). After the synthesis, significant changes of several peaks indicate the transformation of MAX phase to MXene; the (103) peak of  $\text{Nb}_2\text{AlC}$ , around  $2\theta$  of 39, disappears after synthesis, and the (002) peak of  $\text{Nb}_2\text{AlC}$  corresponding to  $2\theta$  of 12.9 shifts to a lower angle. Disappeared (103) peak represents that Al layer was removed, and shifted (002) peak means that inter-layer space of  $\text{Nb}_2\text{CT}_x$  was increased.



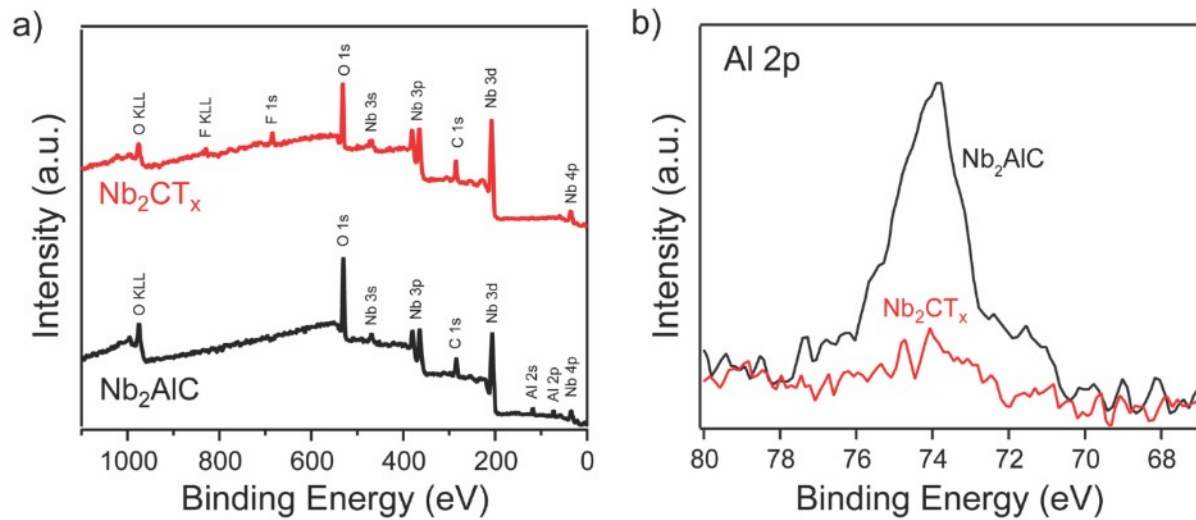

Fig. S7. a) Wide scan XPS spectra of  $\text{Nb}_2\text{CT}_x$  (MXene) and  $\text{Nb}_2\text{AlC}$  (MAX phase), b) High resolution XPS spectra of  $\text{Nb}_2\text{AlC}$  (black) and  $\text{Nb}_2\text{CT}_x$  (red) at Al 2p region.

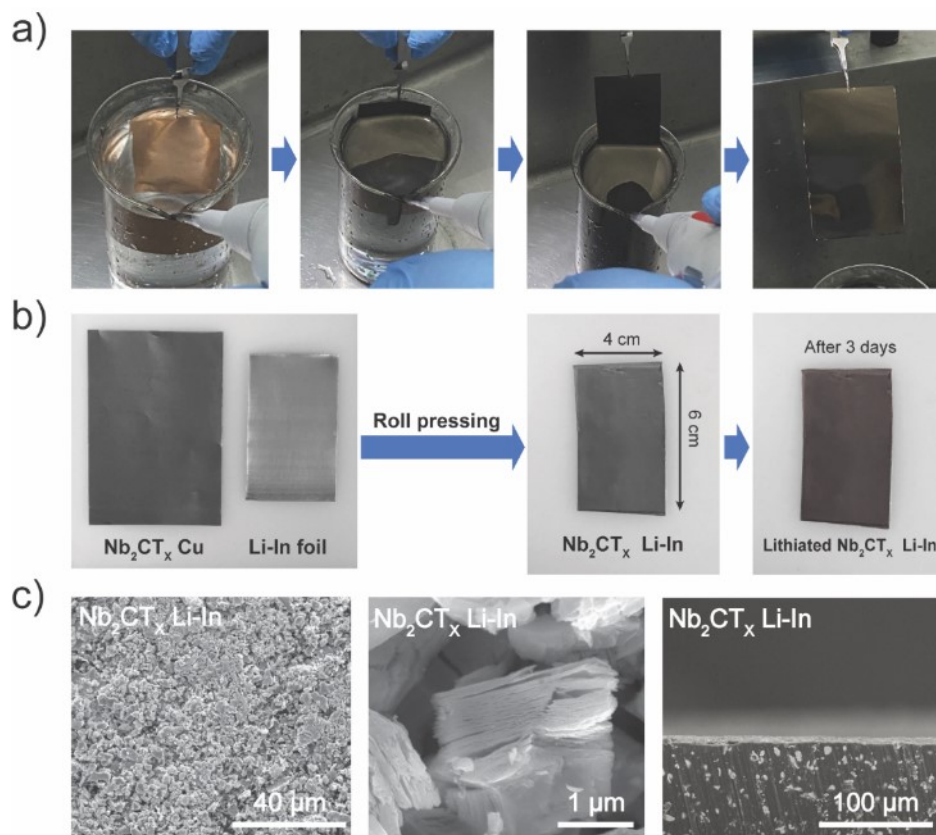

Fig. S8. Preparation and morphologies of the  $\text{Nb}_2\text{CT}_x$  Li-In anodes. Optical image of the a)  $\text{Nb}_2\text{CT}_x$  ASEI on Cu foil using the Langmuir–Blodgett scooping (LBS) method; b)  $\text{Nb}_2\text{CT}_x$  Cu and Li-In foil (left),  $\text{Nb}_2\text{CT}_x$  Li-In right after  $\text{Nb}_2\text{CT}_x$  ASEI transfer to Li-In via roll pressing (middle) and  $\text{Nb}_2\text{CT}_x$  Li-In after 3 days in a dry capsule (right). c) Large-area SEM image (left, top view), enlarged SEM image (middle, top view), and SEM image (right, cross section view) of the  $\text{Nb}_2\text{CT}_x$  Li-In anode.

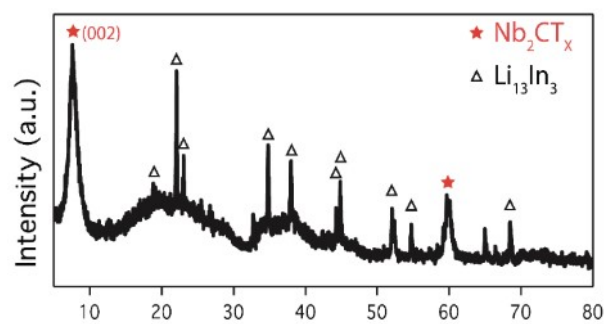

Fig. S9. XRD profile of the  $Nb_2CT_x$  Li-In anode. The XRD peaks of  $Nb_2CT_x$  and  $Li_{13}In_3$  are indicated by the filled star and empty triangle symbols, respectively.

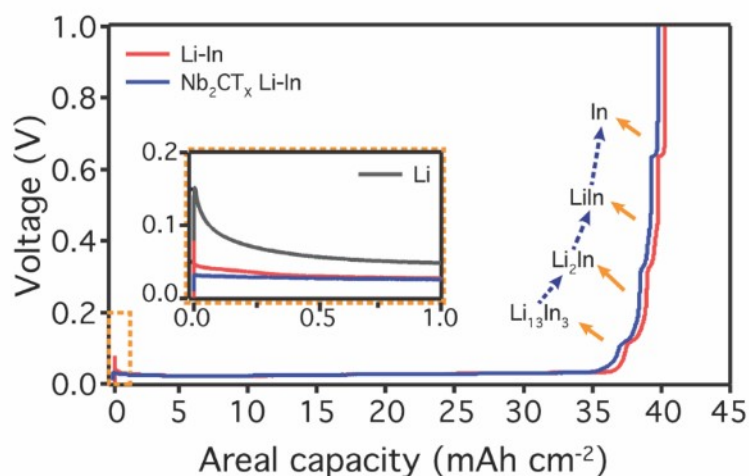

Fig. S10. Practical areal capacity measurement for  $\text{Nb}_2\text{CT}_x$  Li-In and Li-In alloy anode using symmetric cell. Voltage profile taking at a fixed current density of  $1 \text{ mA cm}^{-2}$  with voltage cut-off at 1V. The areal masses of  $\text{Nb}_2\text{CT}_x$  Li-In and Li-In alloy anodes are  $13.52 \text{ mg cm}^{-2}$  and  $13.24 \text{ mg cm}^{-2}$ . Capacities of  $\text{Nb}_2\text{CT}_x$  Li-In and Li-In alloy anodes are  $39.63 \text{ mAh cm}^{-2}$  ( $2926.64 \text{ mAh g}^{-1}$ ) and  $39.97 \text{ mAh cm}^{-2}$  ( $3021.44 \text{ mAh g}^{-1}$ ). The areal capacity of  $\text{Nb}_2\text{CT}_x$  Li-In alloy anode was slightly reduced due to pressure during roll pressing process for transfer of  $\text{Nb}_2\text{CT}_x$  ASEI. The inset shows the enlarged voltage profile from 0 to  $1.0 \text{ mAh cm}^{-2}$  with voltage profile of pure Li from Fig. 1b.

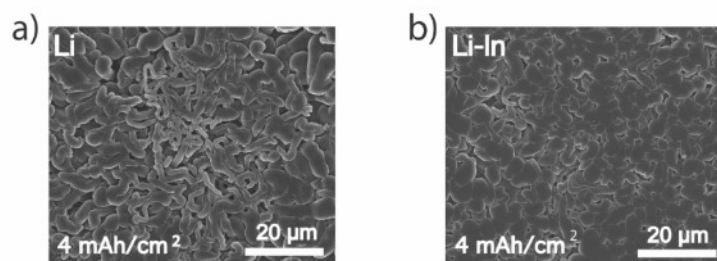

Fig S11. SEM surface morphologies of galvanostatic Li re-electrodeposition onto the f) Li anode and g) Li-In alloy anode after Li stripping of  $4\text{mAh cm}^{-2}$  at a fixed current density of  $1\text{mAh cm}^{-2}$  and capacity of  $4\text{mAh cm}^{-2}$ .

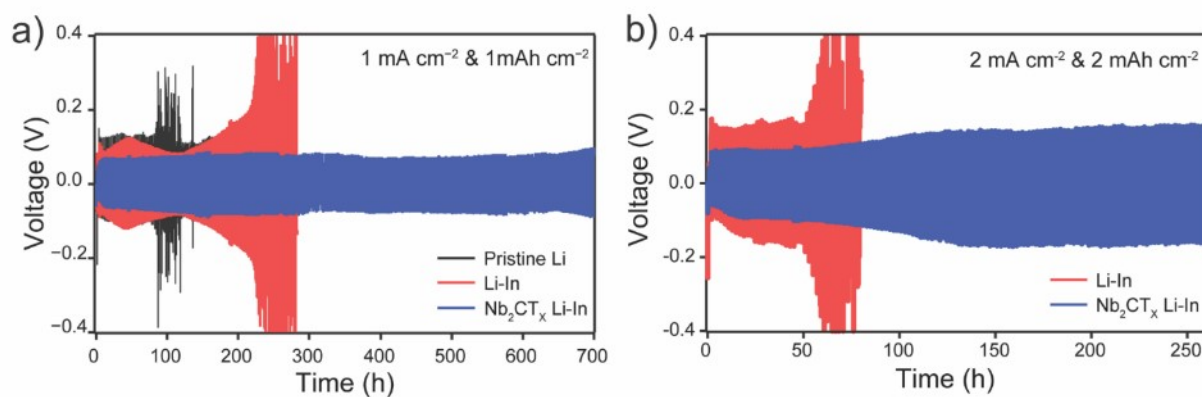

Fig. S12. Galvanostatic Li stripping/plating voltage profiles for the Li (black), Li-In (red) and  $\text{Nb}_2\text{CT}_x$  ASEI Li-In (blue) anodes. Voltage profiles were measured by Li|Li, Li-In|Li-In, and Li-In  $\text{Nb}_2\text{CT}_x$ | $\text{Nb}_2\text{CT}_x$  Li-In symmetric cells at a)  $1\text{mA cm}^{-2}/1\text{mAh cm}^{-2}$  and b)  $2\text{mA cm}^{-2}/2\text{mAh cm}^{-2}$ .

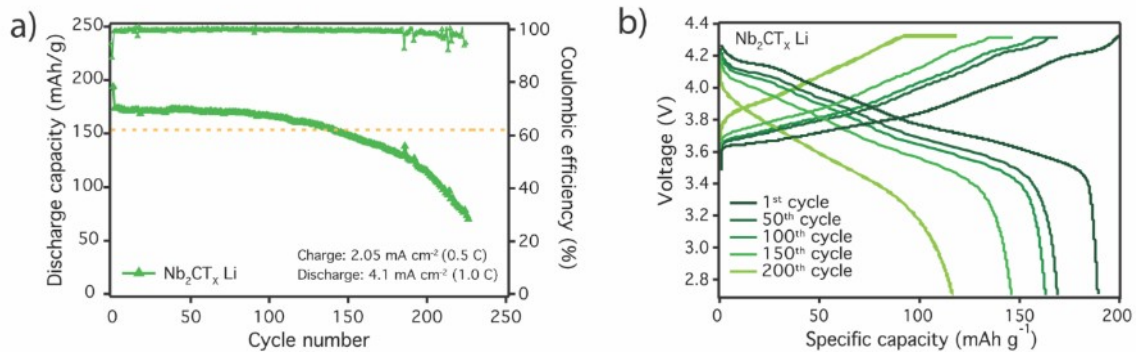

Fig. S13. a) Electrochemical full cell cycling performance with  $\text{Li Nb}_2\text{CT}_x|\text{NCM811}$  based on discharge capacity (filled symbols, left axis) and Coulombic efficiency (empty symbols, right axis). The full cell was fabricated at an n/p ratio of 11.0 and by using an electrolyte of  $8.6 \mu\text{L mAh}^{-1}$ . Operating conditions of full-cell cycling were 0.5 C for charging, 1.0 C for discharging, and voltage window of 2.7–4.3 V. The first highest discharge capacity point was measured at formation cycle (0.1 C charge & discharge); the yellow dashed line indicates 80% of the initial discharge capacity of each cell. b) Corresponding voltage profiles of  $\text{Li Nb}_2\text{CT}_x|\text{NCM811}$ .

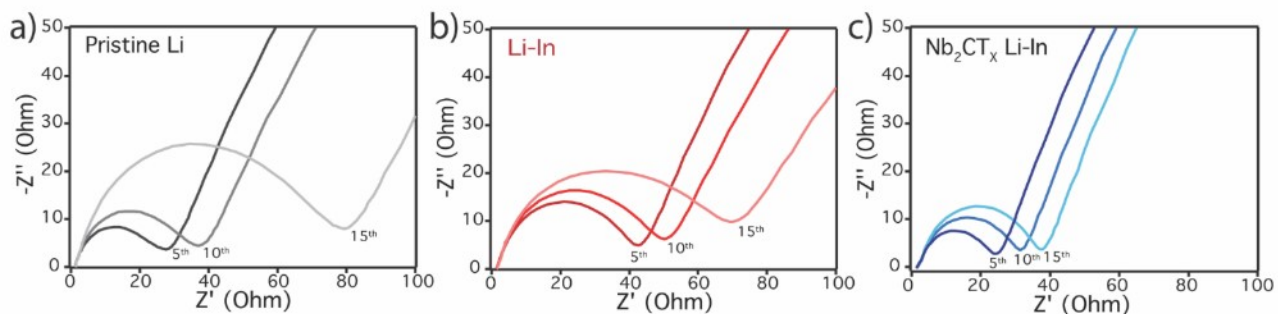

Fig. S14. Nyquist plots after 1<sup>st</sup>, 5<sup>th</sup>, 10<sup>th</sup>, and 15<sup>th</sup> cycle for a) Li|NCM811, b) Li-In|NCM811, c) Li-In Nb<sub>2</sub>CT<sub>x</sub>|NCM811 full cell.

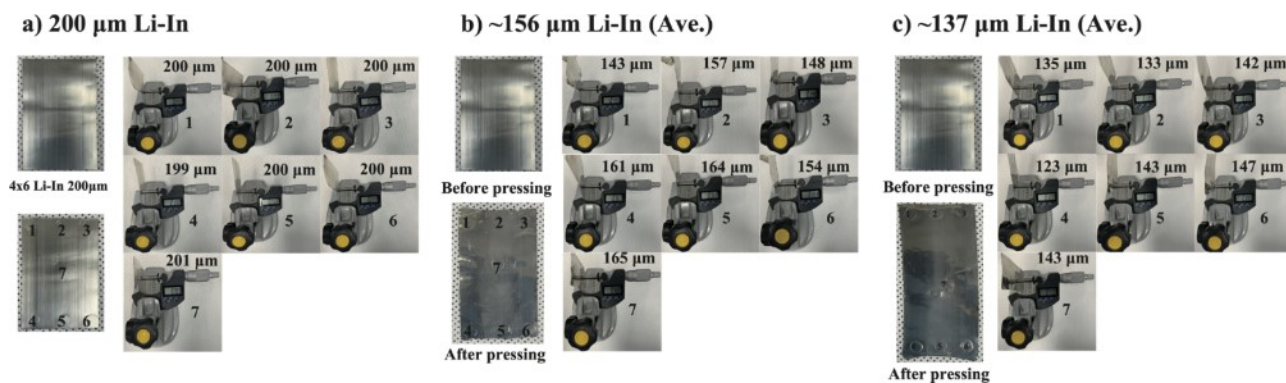

Fig. S15. Li-In foil thickness and roll-pressing results. a) Pristine Li-In foil from the company (Honzo metal, Japan), b) roll-pressed Li-In foil (average thickness of  $\sim 156 \mu\text{m}$ ), and c) roll-pressed Li-In foil (average thickness of  $\sim 137 \mu\text{m}$ ).

|                               | Nb <sub>2</sub> C-O-Li                                                            | Nb <sub>2</sub> C-F-Li                                                             | Nb <sub>2</sub> C-OH-Li                                                             |
|-------------------------------|-----------------------------------------------------------------------------------|------------------------------------------------------------------------------------|-------------------------------------------------------------------------------------|
| Atomic structure              | 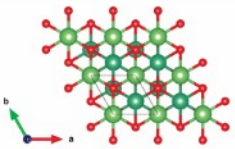 |  |  |
| Termination group formation E | -7.213 eV                                                                         | -6.238 eV                                                                          | -6.209 eV                                                                           |
| Li binding E                  | -1.577 eV                                                                         | -1.516 eV                                                                          | +0.814 eV                                                                           |
|                               | Nb <sub>2</sub> C-O, F-Li                                                         | Nb <sub>2</sub> C-O, OH-Li                                                         | Nb <sub>2</sub> C-F, OH-Li                                                          |
| Atomic structure              |  |  |  |
| Termination group formation E | -6.663 eV                                                                         | -6.846 eV                                                                          | -6.279 eV                                                                           |
| Li binding E                  | -1.409 eV                                                                         | -0.818 eV                                                                          | -0.249 eV                                                                           |

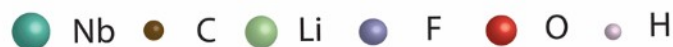

Table S1. The calculation of termination group formation energy and Li binding energy on the Nb<sub>2</sub>C (MXene) surface. Images in the table are Nb<sub>2</sub>CT<sub>x</sub> atomic structure with termination groups and Li adatoms. Cyan blue, brown, green, purple, red, and pink spheres are Niobium, Carbon, Lithium, Fluorine, Oxygen, and Hydrogen atom, respectively.



| No. | Thickness ( $\mu\text{m}$ ) |     |     |     |     |     |     | Ave. | Max. error |
|-----|-----------------------------|-----|-----|-----|-----|-----|-----|------|------------|
|     | 1                           | 2   | 3   | 4   | 5   | 6   | 7   |      |            |
| a)  | 200                         | 200 | 200 | 199 | 200 | 200 | 201 | 200  | 1          |
| b)  | 143                         | 157 | 148 | 161 | 164 | 154 | 165 | 156  | 13         |
| c)  | 135                         | 133 | 142 | 123 | 143 | 137 | 143 | 137  | 12         |

Table S2. Li-In foil thickness before and after roll-pressing from Fig. S15

## References

- 1 J. Sangster and A. D. Pelton, 1991, **12**, 290–292.
